# Supplementary material for: The Higher Water Absorption Capacity of Small Root System Improved the Yield and Water Use Efficiency of Maize
Source: MDPI journal article supplement (doi:10.3390/plants11172300), 2022-09-02
Supplement: s1 [file s1]

*Supplementary Material*

**Table S1.** PCA of growth and physiological parameters under well-watered (WW) and drought stress (WS) conditions. Means for both water treatments were combined for the PCA.

|                            | PC1           | PC2            |
|----------------------------|---------------|----------------|
| GY                         | <b>0.3397</b> | 0.1422         |
| HKW                        | 0.2418        | <b>0.3792</b>  |
| EL                         | <b>0.2921</b> | -0.0862        |
| WUE                        | -0.1033       | <b>0.5153</b>  |
| ET                         | <b>0.3551</b> | -0.0738        |
| Lpr                        | <b>0.2948</b> | 0.0851         |
| Ψ                          | 0.1173        | <b>0.3584</b>  |
| Pn                         | <b>0.3436</b> | 0.0640         |
| GS                         | <b>0.3285</b> | 0.1497         |
| E                          | <b>0.3355</b> | -0.1751        |
| iWUE                       | -0.1751       | <b>0.4366</b>  |
| RW                         | 0.0834        | <b>-0.4168</b> |
| SW                         | <b>0.3563</b> | -0.0103        |
| Variation proportion       |               |                |
| Eigenvalue                 | 7.51422       | 2.6941         |
| Variance (%)               | 57.8017       | 20.7242        |
| Cumulative variability (%) | 57.8017       | 78.5259        |

Abbreviations for the indices are defined in Table 3. Numbers in bold font indicate the key PC factors of PC with the highest scores.
